# Supplementary material
Source: HighWire-hosted journal article supplement (https://bmjopen.bmj.com/content/10/9/e032546)
Supplement: inline-supplementary-material-2 [file inline-supplementary-material-2.pdf]

S2 Table. Scoring of the questionnaires

|                                                                                           |                                                                                |                    |
|-------------------------------------------------------------------------------------------|--------------------------------------------------------------------------------|--------------------|
| <b>In which countries can Chagas disease be found?</b><br><br>(maximum 1.5 point)         | a. Only in Latin American countries                                            | 0 point            |
|                                                                                           | b. In Latin America, the United States, Europe, Japan and Australia            | 0.5 point          |
|                                                                                           | c. Worldwide                                                                   | 1 point            |
| <b>How is Chagas disease spread?</b><br><br>(maximum 4 points)                            | By the bite of the kissing bug (vinchuca, chinche besucona, barbeiro)          | 1 point            |
|                                                                                           | By transfusion of blood or infected organs                                     | 1 point            |
|                                                                                           | From mother to child during pregnancy if the woman is infected                 | 1 point            |
|                                                                                           | By consumption of food contaminated with the infected kissing-bug              | 1 point            |
|                                                                                           | By kisses and hugs.<br>None of them.                                           | 0 point<br>0 point |
| <b>What symptoms does Chagas disease give?</b><br><br>(maximum 2 points)                  | Sight problems.                                                                | 0 point            |
|                                                                                           | Heart problems.                                                                | 1 point            |
|                                                                                           | Digestive symptoms.                                                            | 1 point            |
|                                                                                           | Digestive and heart disorders.                                                 | 2 points           |
|                                                                                           | None of these                                                                  | 0 point            |
| <b>If you are tested for Chagas and the result is positive:</b><br><br>(maximum 1 points) | It means that I have the disease                                               | 0 point            |
|                                                                                           | It means that I am infected, but I may not be sick.                            | 1 point            |
|                                                                                           | Only 3 out of 10 people infected develop the disease.                          |                    |
|                                                                                           | It means that I am infected and I have the disease for life, it is no-curable. | 0 point            |
| <b>Is the available treatment useful?</b><br><br>(maximum 1 points)                       | Not useful                                                                     | 0 point            |
|                                                                                           | It is useful only for children                                                 | 0 point            |
|                                                                                           | It is not useful in advanced cases but it is in other cases.                   | 1 point            |
